# Supplementary material
Source: Research Square preprint supplement (doi:10.21203/rs.3.rs-9434404/v1)
Supplement: Supplementary file 1 [file 3e1689f77fd710ef850f2659.docx]

# Expert Evaluation Questionnaire for AI-Generated Prosthodontic MCQs

**Study title:** Comparative Evaluation of ChatGPT-5 and DeepSeek-V3 for Generating Prosthodontic Multiple-Choice Questions: An Expert-Rated Study

## Purpose

This questionnaire was developed for the present study to enable blinded expert evaluation of single best-answer multiple-choice questions (MCQs) generated from an undergraduate prosthodontics textbook. Experts were asked to evaluate each MCQ independently using six predefined quality dimensions on a five-point Likert scale.

## Instructions for expert evaluators

1. Evaluate each MCQ according to the reference textbook content and the item-writing criteria below.
2. Rate each dimension from 1 to 5, where higher scores indicate better item quality.
3. Assess the question stem, answer options, correct answer, and explanation as a complete item.
4. Do not consider the identity of the AI model when assigning scores; model information should remain blinded during evaluation.
5. Provide comments whenever a score below 4 is assigned, or whenever an item requires revision before use in an examination.
6. For final review, indicate whether the item is suitable for direct use, suitable after minor revision, requires major revision, or should be excluded.

## Evaluator and item information

| Field | Response |
| --- | --- |
| Evaluator ID |  |
| Date |  |
| Item ID |  |
| Chapter/topic |  |
| MCQ stem |  |
| Options | A. . . . |
| Correct answer |  |
| Explanation reviewed | □ Yes □ No |
| Model identity | Blinded to evaluator |
| Evaluation round | □ Initial independent rating □ Final adjudication |

##

##

## Five-point rating scale

| **Score** | **General interpretation** |
| --- | --- |
| 5 | Excellent: fully meets the criterion; no substantive revision is required. |
| 4 | Good: meets the criterion with only minor issues; generally acceptable for examination use. |
| 3 | Fair: partially meets the criterion but has noticeable limitations; revision is recommended before use. |
| 2 | Poor: major problems are present; substantial revision is required. |
| 1 | Unacceptable: does not meet the criterion; the item is invalid or should be excluded. |

## Evaluation dimensions and scoring rubric

| **Dimension** | **Definition** | **Lower score indicators** | **Score**  **(1–5)** |
| --- | --- | --- | --- |
| 1. Relevance to textbook content | The item assesses content that is clearly covered by the uploaded/reference prosthodontics textbook and is appropriate for the assigned chapter/topic. | Score lower when the item is outside the textbook scope, belongs mainly to another discipline, duplicates another item without educational value, or tests content not supported by the reference material. |  |
| 2. Grammatical clarity and accuracy | The stem, options, and explanation are written in clear, grammatically correct English with appropriate dental/prosthodontic terminology. | Score lower when wording is awkward, terminology is inaccurate, syntax is confusing, or language errors may affect understanding. |  |
| 3. Answer correctness | The keyed answer is factually correct, clearly the single best answer, and consistent with the explanation and textbook content. | Score lower when the answer is wrong, insufficiently accurate, unsupported by the textbook, inconsistent with the explanation, or when more than one answer may be correct. |  |
| 4. Distractor appropriateness | Incorrect options are plausible, homogeneous, professionally relevant, and not obviously true or false. Distractors should not contain clues that reveal the correct answer. | Score lower when distractors are implausible, too easy, factually incorrect in an inappropriate way, uneven in length/detail, contain keyword clues, include multiple correct answers, or lack a correct option. |  |
| 5. Avoidance of misleading stem wording | The stem is specific, unambiguous, and provides sufficient information for examinees to identify the intended single best answer without being misled by vague or misleading phrasing. | Score lower when the stem is vague, overly broad, ambiguous, uses undefined terms, asks for an unclear “most important” or “critical” factor, or could be interpreted in multiple ways. |  |
| 6. Discriminatory ability | The item has an appropriate level of difficulty and can distinguish students with different levels of prosthodontic knowledge or reasoning ability. | Score lower when the item is trivial, relies only on common knowledge, contains obvious clues, is excessively easy or excessively obscure, or fails to assess meaningful knowledge integration. |  |

##

## Item-level decision after review

| **Decision** | **Definition** |
| --- | --- |
| □ Suitable for direct use | The item can be used in an examination without substantive revision. |
| □ Suitable after minor revision | Only minor wording or formatting changes are required; the item remains educationally valid. |
| □ Major revision required | Substantial content, option, answer, or wording revision is required before use. |
| □ Exclude | The item is unsuitable because of serious flaws such as incorrect answer, poor relevance, multiple correct answers, or unresolvable ambiguity. |

## Primary reason(s) for revision or exclusion

□ Insufficient relevance to textbook content
□ Grammatical or terminology problem
□ Incorrect or insufficiently accurate answer
□ Unreasonable or implausible distractors
□ Multiple potentially correct answers
□ No clearly correct option
□ Misleading or ambiguous stem
□ Low discriminatory ability / too easy
□ Content outside the assigned chapter or discipline
□ Duplicate or near-duplicate item
□ Other: ________________________________

## Blank scoring sheet for batch evaluation

This table may be duplicated as needed for batch scoring of MCQs.

| **Item ID** | **Chapter/topic** | **Relevance** | **Grammar** | **Answer correctness** | **Distractors** | **Non-misleading stem** | **Discrimination** | **Decision** | **Comments** |
| --- | --- | --- | --- | --- | --- | --- | --- | --- | --- |
|  |  |  |  |  |  |  |  |  |  |
|  |  |  |  |  |  |  |  |  |  |
|  |  |  |  |  |  |  |  |  |  |
|  |  |  |  |  |  |  |  |  |  |
|  |  |  |  |  |  |  |  |  |  |
|  |  |  |  |  |  |  |  |  |  |
|  |  |  |  |  |  |  |  |  |  |
|  |  |  |  |  |  |  |  |  |  |
|  |  |  |  |  |  |  |  |  |  |
|  |  |  |  |  |  |  |  |  |  |
